# Supplementary material for: Relationship between the sub-micron fraction (SMF) and fine mode fraction (FMF) in the context of AERONET retrievals
Source: Copernicus journal article supplement (doi:10.5194/amt-2022-284), 2022-11-01
Supplement: Supplementary file 1 [file amt-2022-284-supplement.zip]

Archive with 2 entries (2 files):
- Supplementary_material_figure_captions.pdf
- Supplementary_material_figures.pdf
