# Supplementary material for: Relationship between the sub-micron fraction (SMF) and fine mode fraction (FMF) in the context of AERONET retrievals
Source: Copernicus journal article supplement (doi:10.5194/amt-2022-284), 2022-11-01
Supplement: Supplementary file 1 [file amt-2022-284-supplement.zip › Supplementary_material_figure_captions.pdf]

### Figure captions (supplementary material)

Figure S1:  $\eta'$  vs  $\eta$  (SMF vs FMF) scattergrams for the sites of Midway Island, Forth Crete and Solar Village and the Arctic sites of Barrow, PEARL and Thule (see Table 1 for site and aerosol classification details). These scattergrams and those of Figure S2 complement the scattergrams of Figure 6 in the main text (they complete the list of sites given in Table 1).

Figure S2: Seasonal  $r_0$  histograms and associated statistics for Barrow (Level 1.5 retrievals for the same period as that listed in Table 1). Level 1.5 retrievals was employed because there was virtually no Level 2.0 data.
