# Supplementary figures and images for: Relationship between the sub-micron fraction (SMF) and fine mode fraction (FMF) in the context of AERONET retrievals
Source: Copernicus journal article supplement (doi:10.5194/amt-2022-284), 2022-11-01

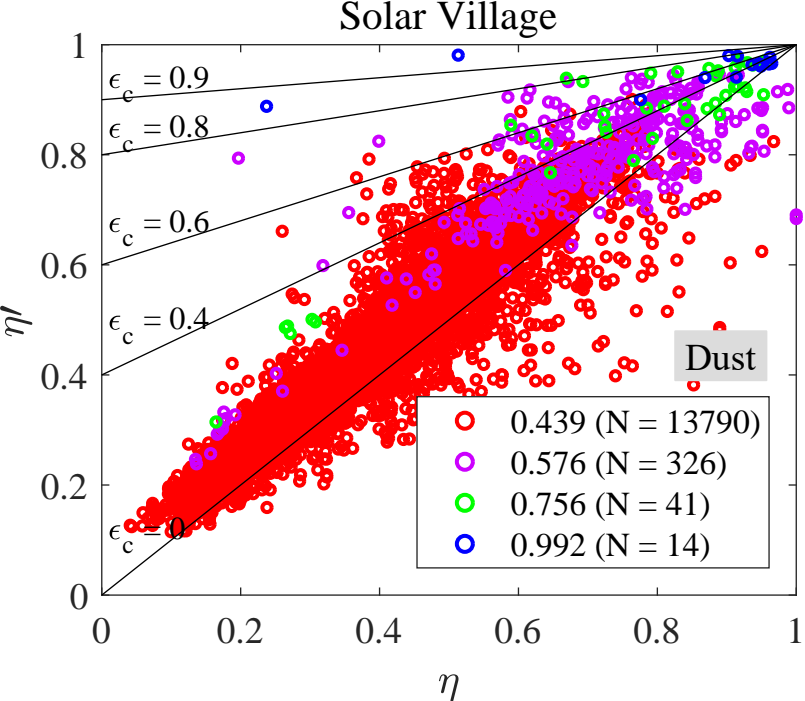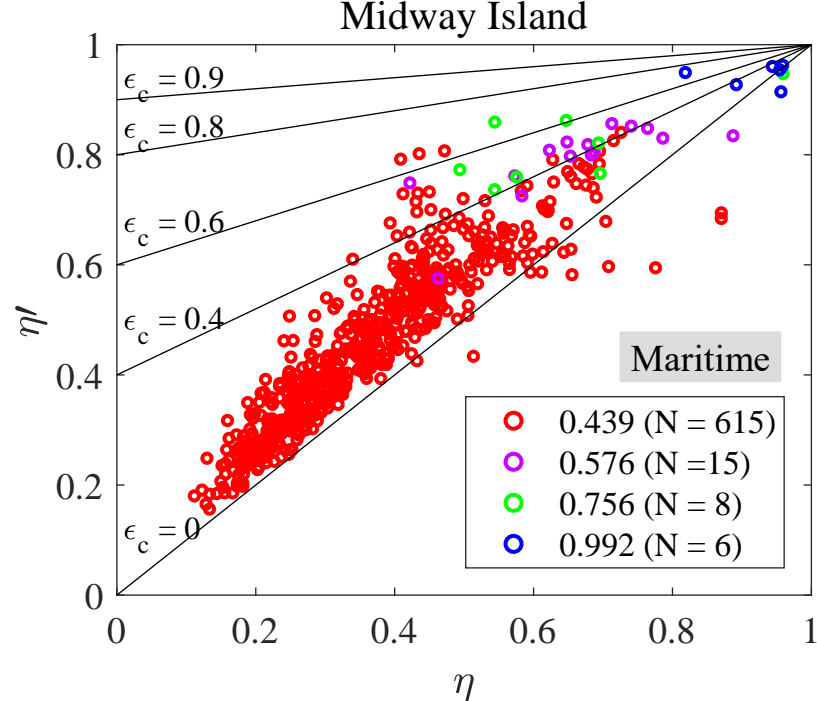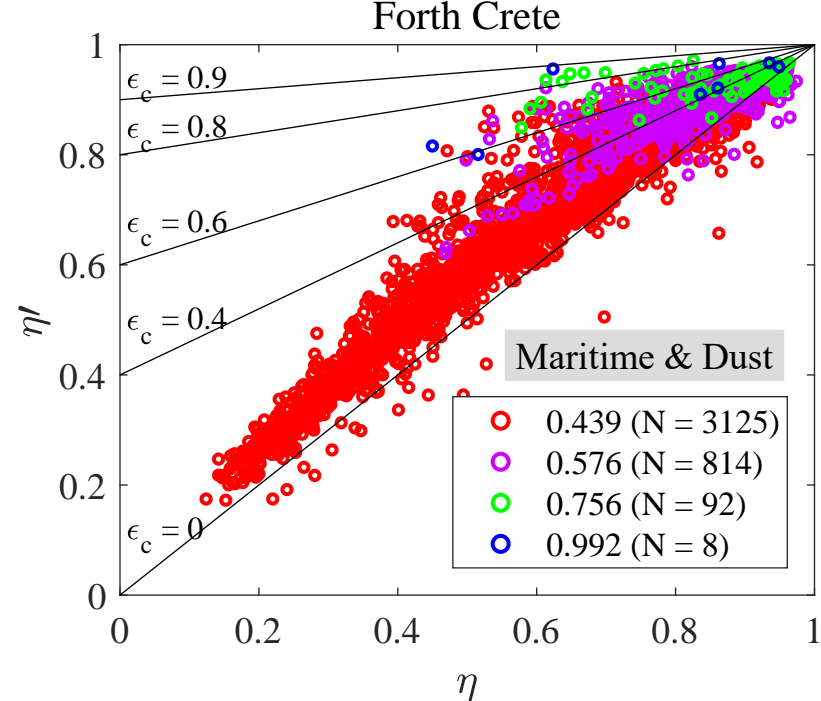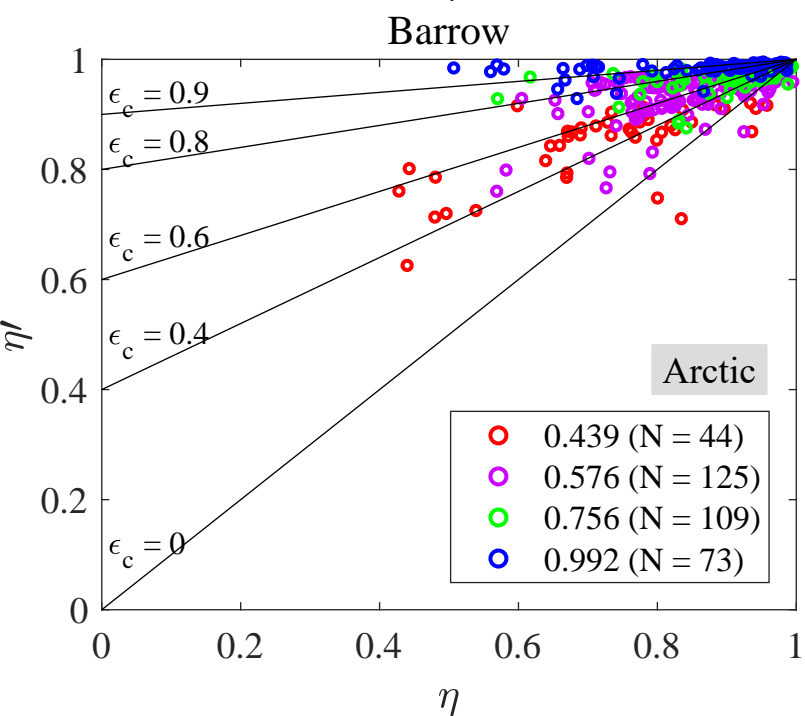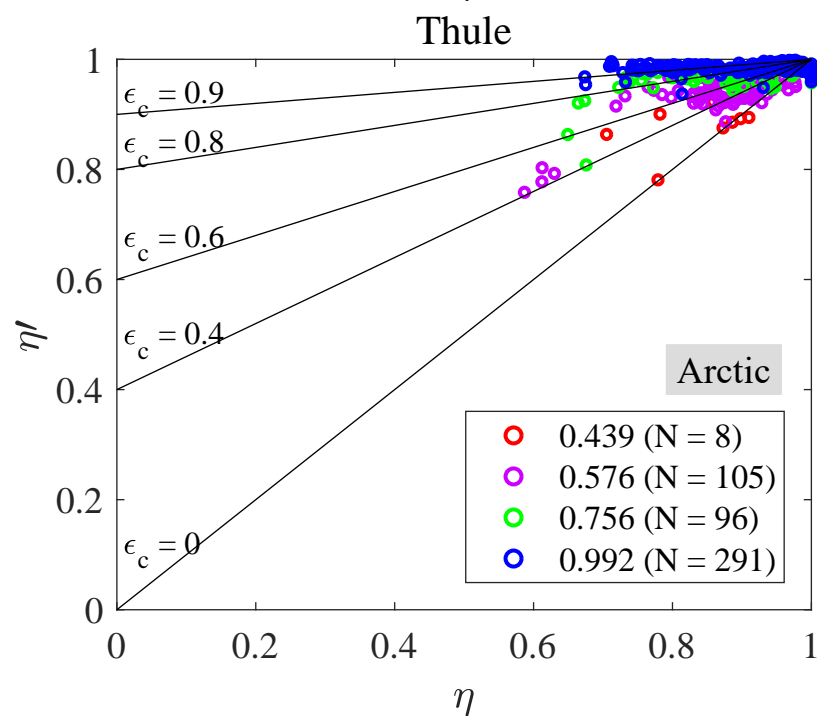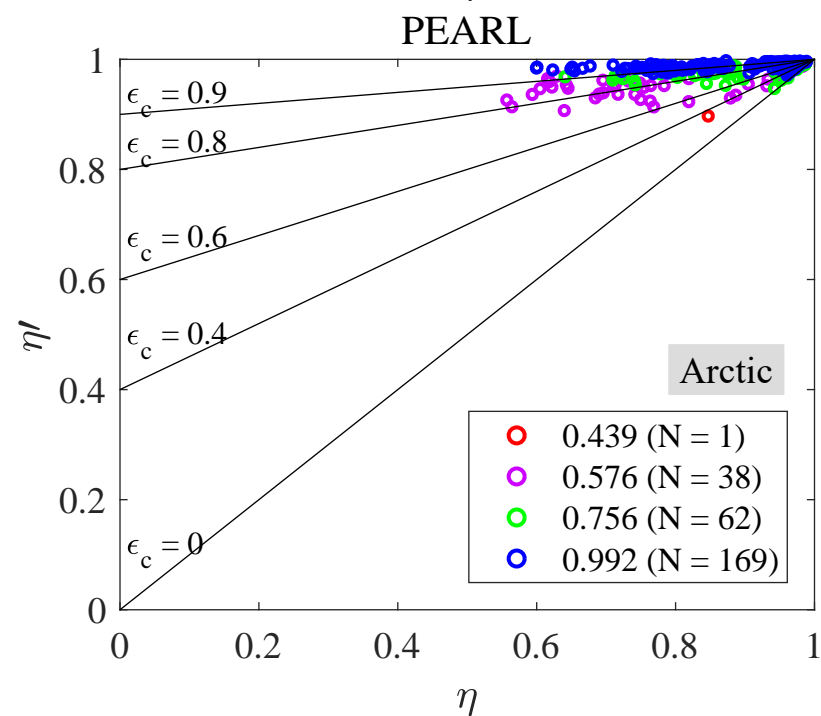

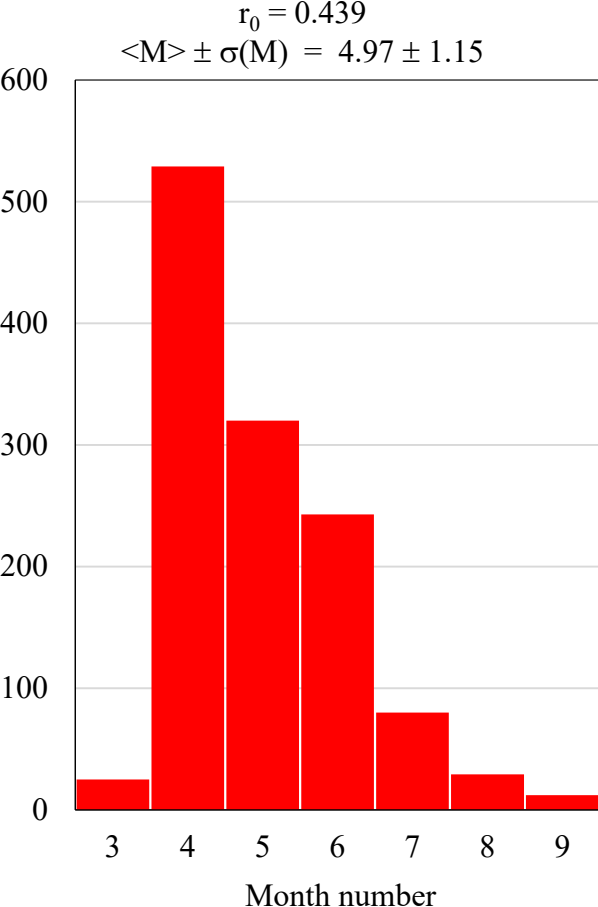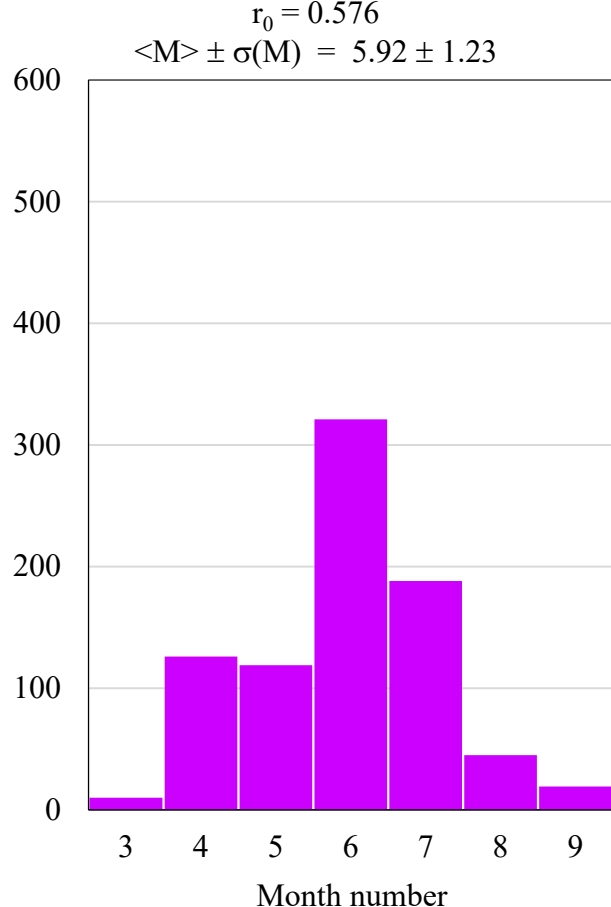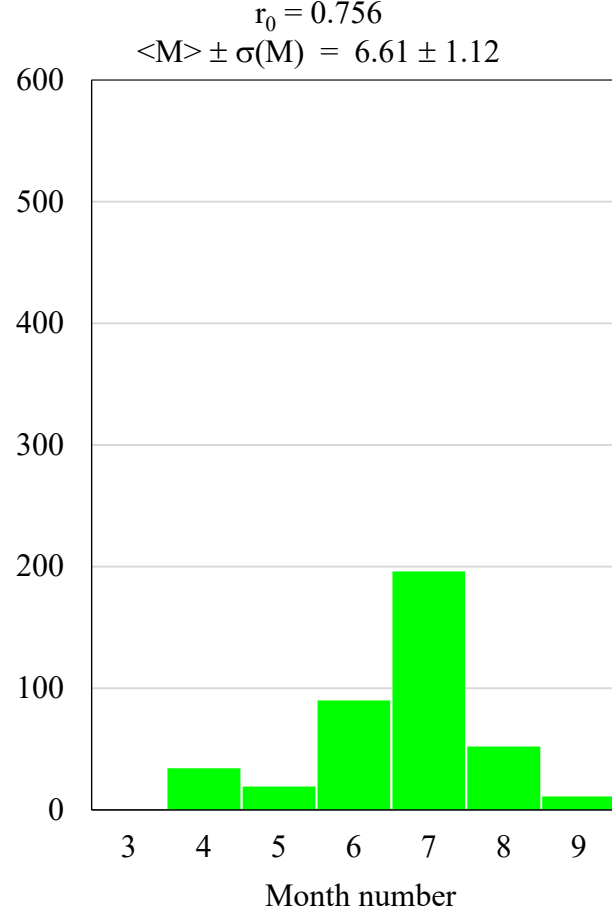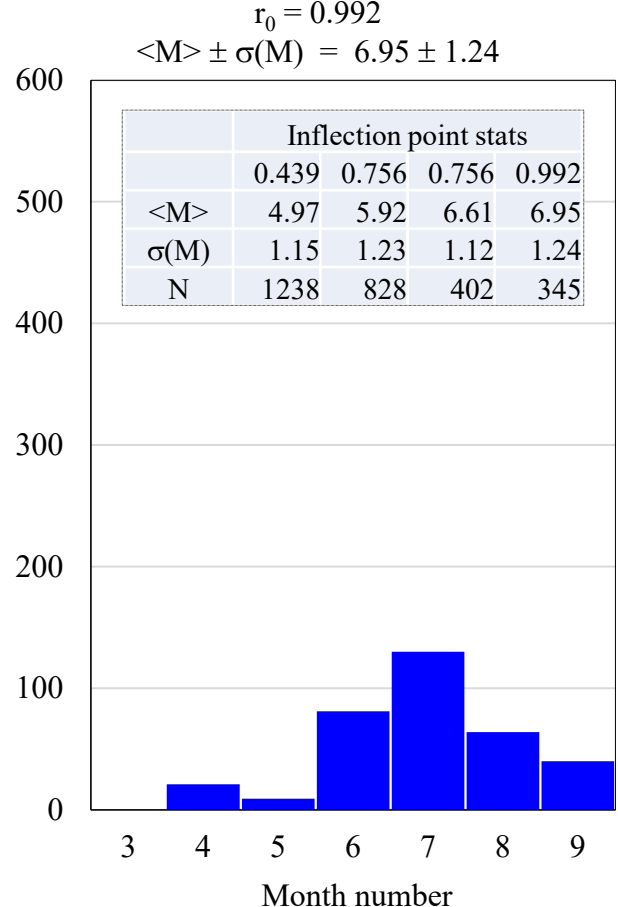

Supplement: Supplementary file 1 [file amt-2022-284-supplement.zip › Supplementary_material_figures.pdf]
